# Supplementary material
Source: Elsevier journal article supplement (https://www.sciencedirect.com/science/article/pii/S0021755720302163)
Supplement: mmc3 [file S0021755720302163:mmc3.docx]

**Figure S1 - Cause and effect diagram for antibiotic therapy within one hour.**

**
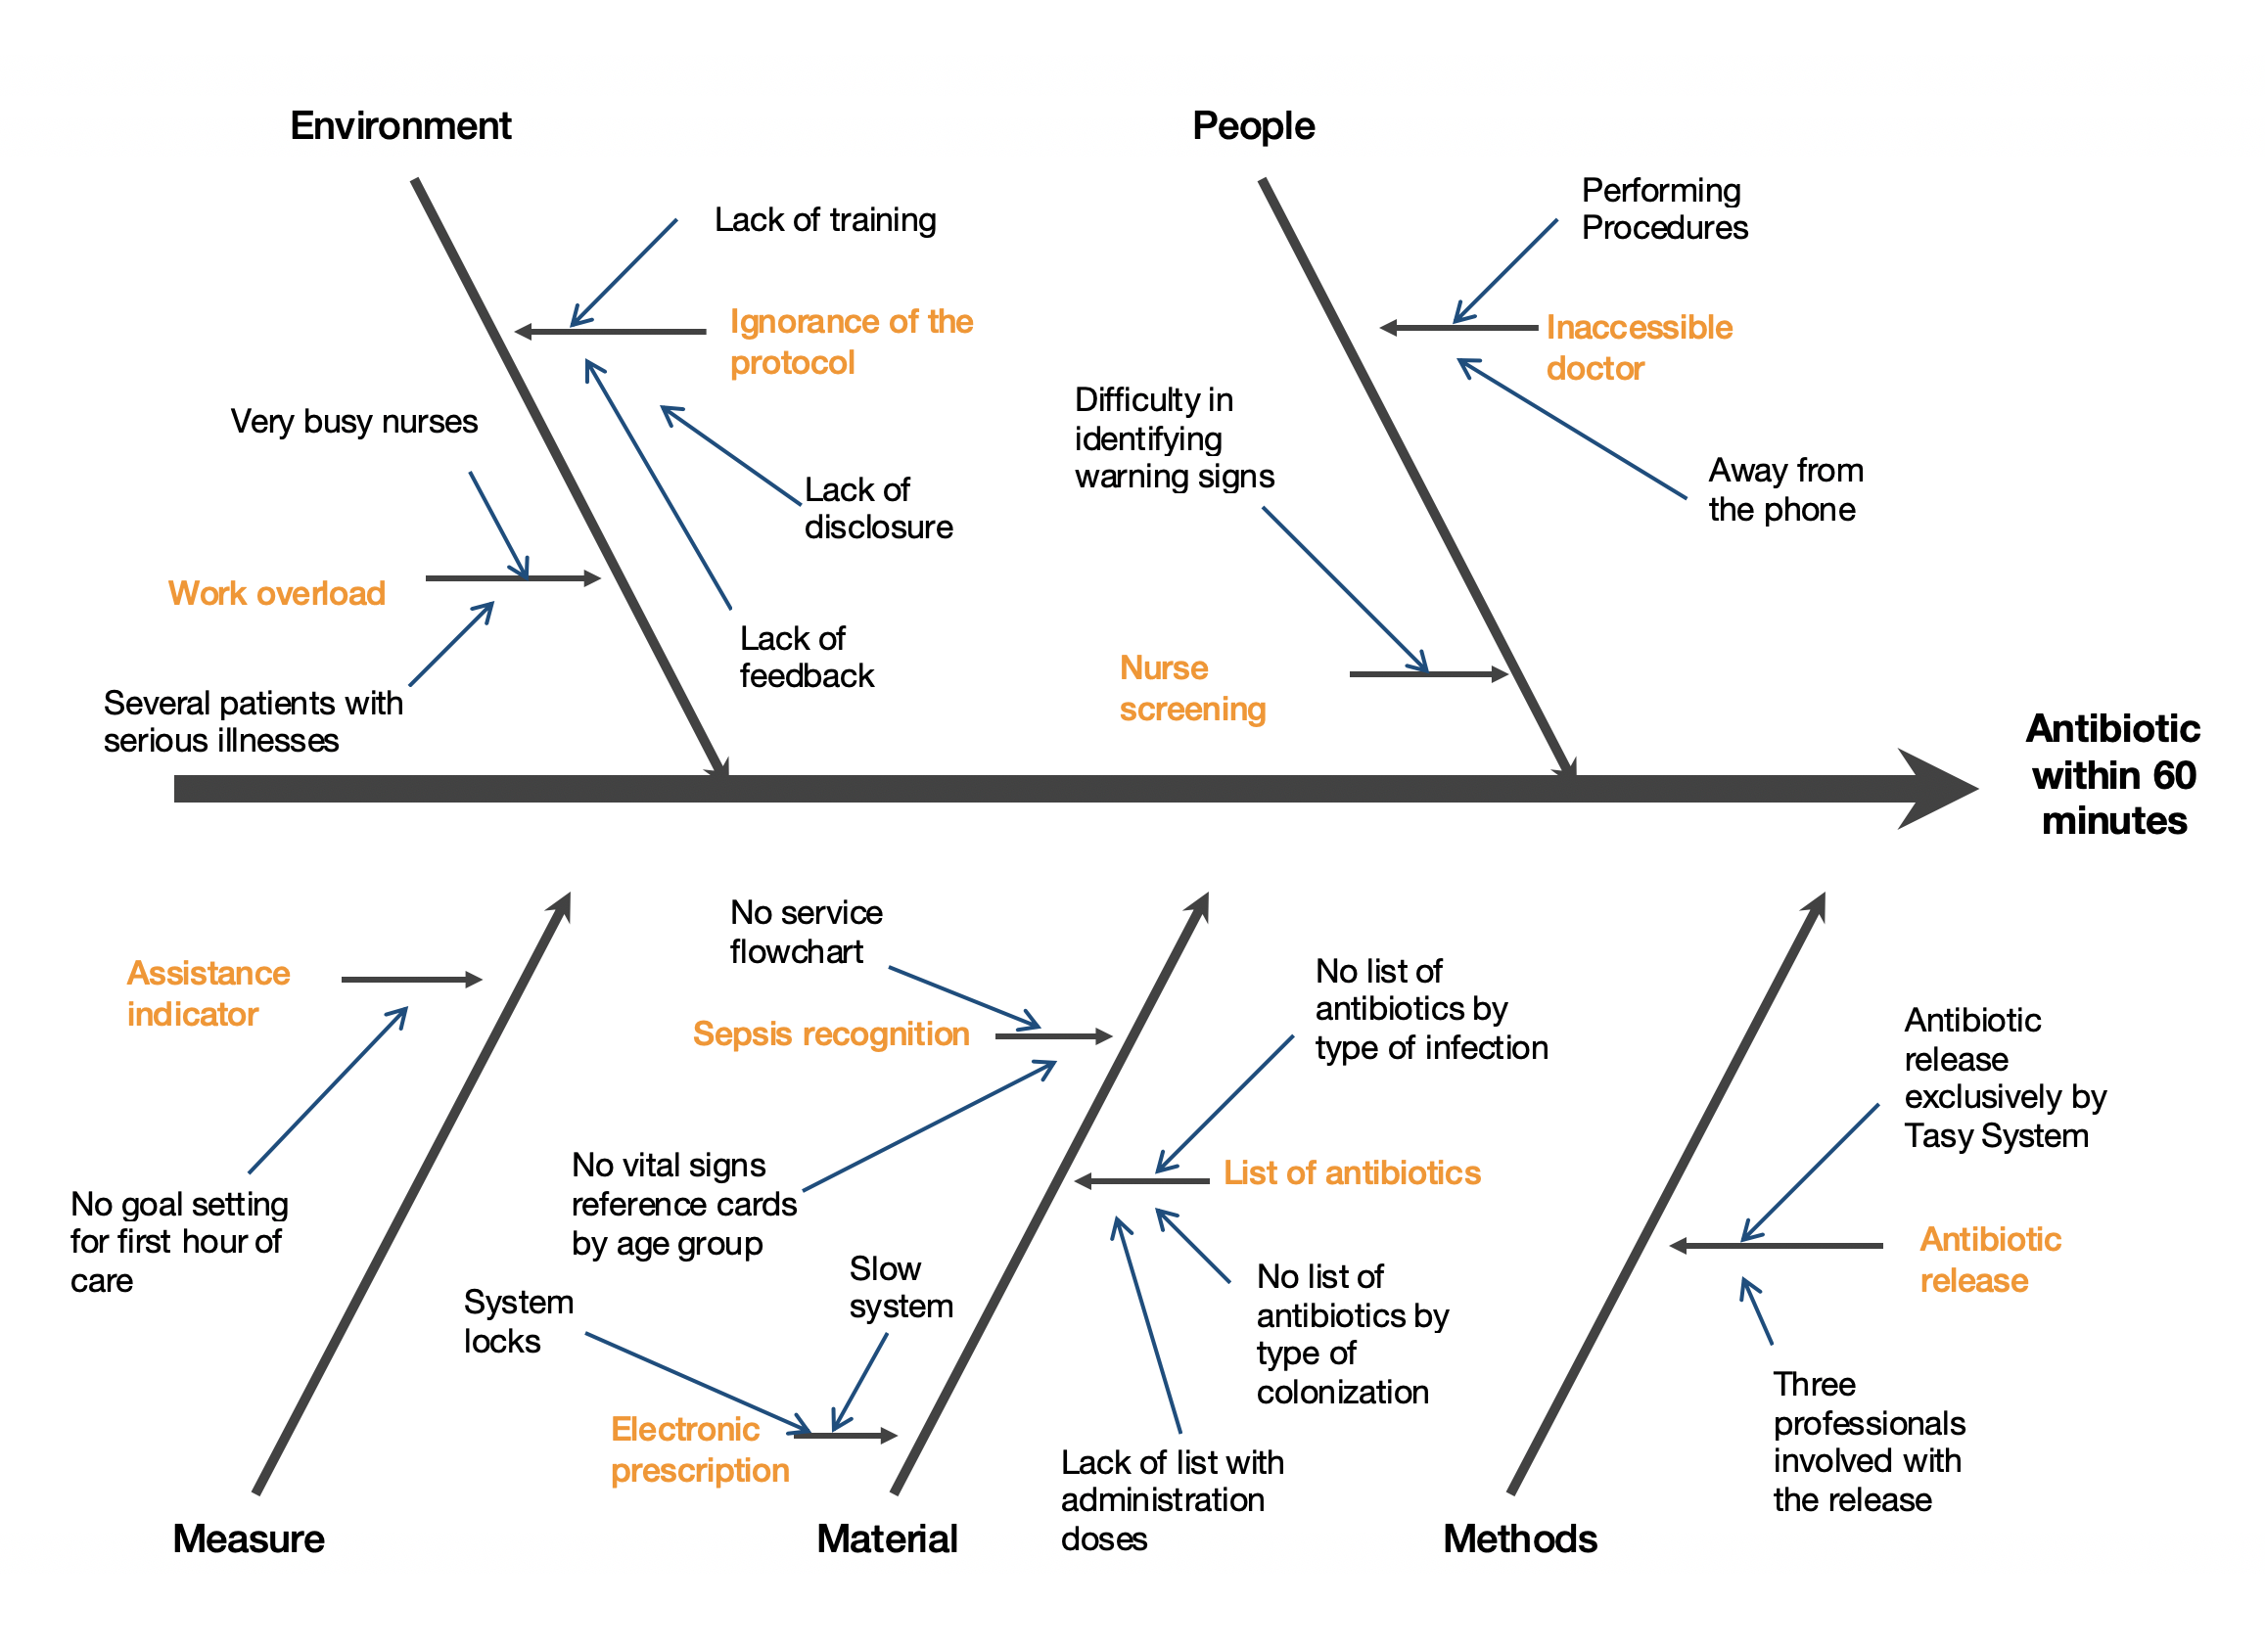
**

Barriers to antibiotic adherence within 60 minutes are categorized into five contributing factors, describing the sub-components and the processes to be worked on in each.
